# Supplementary material
Source: HighWire-hosted journal article supplement (https://jitc.bmj.com/content/9/8/e002279)
Supplement: inline-supplementary-material-8 [file inline-supplementary-material-8.pdf]

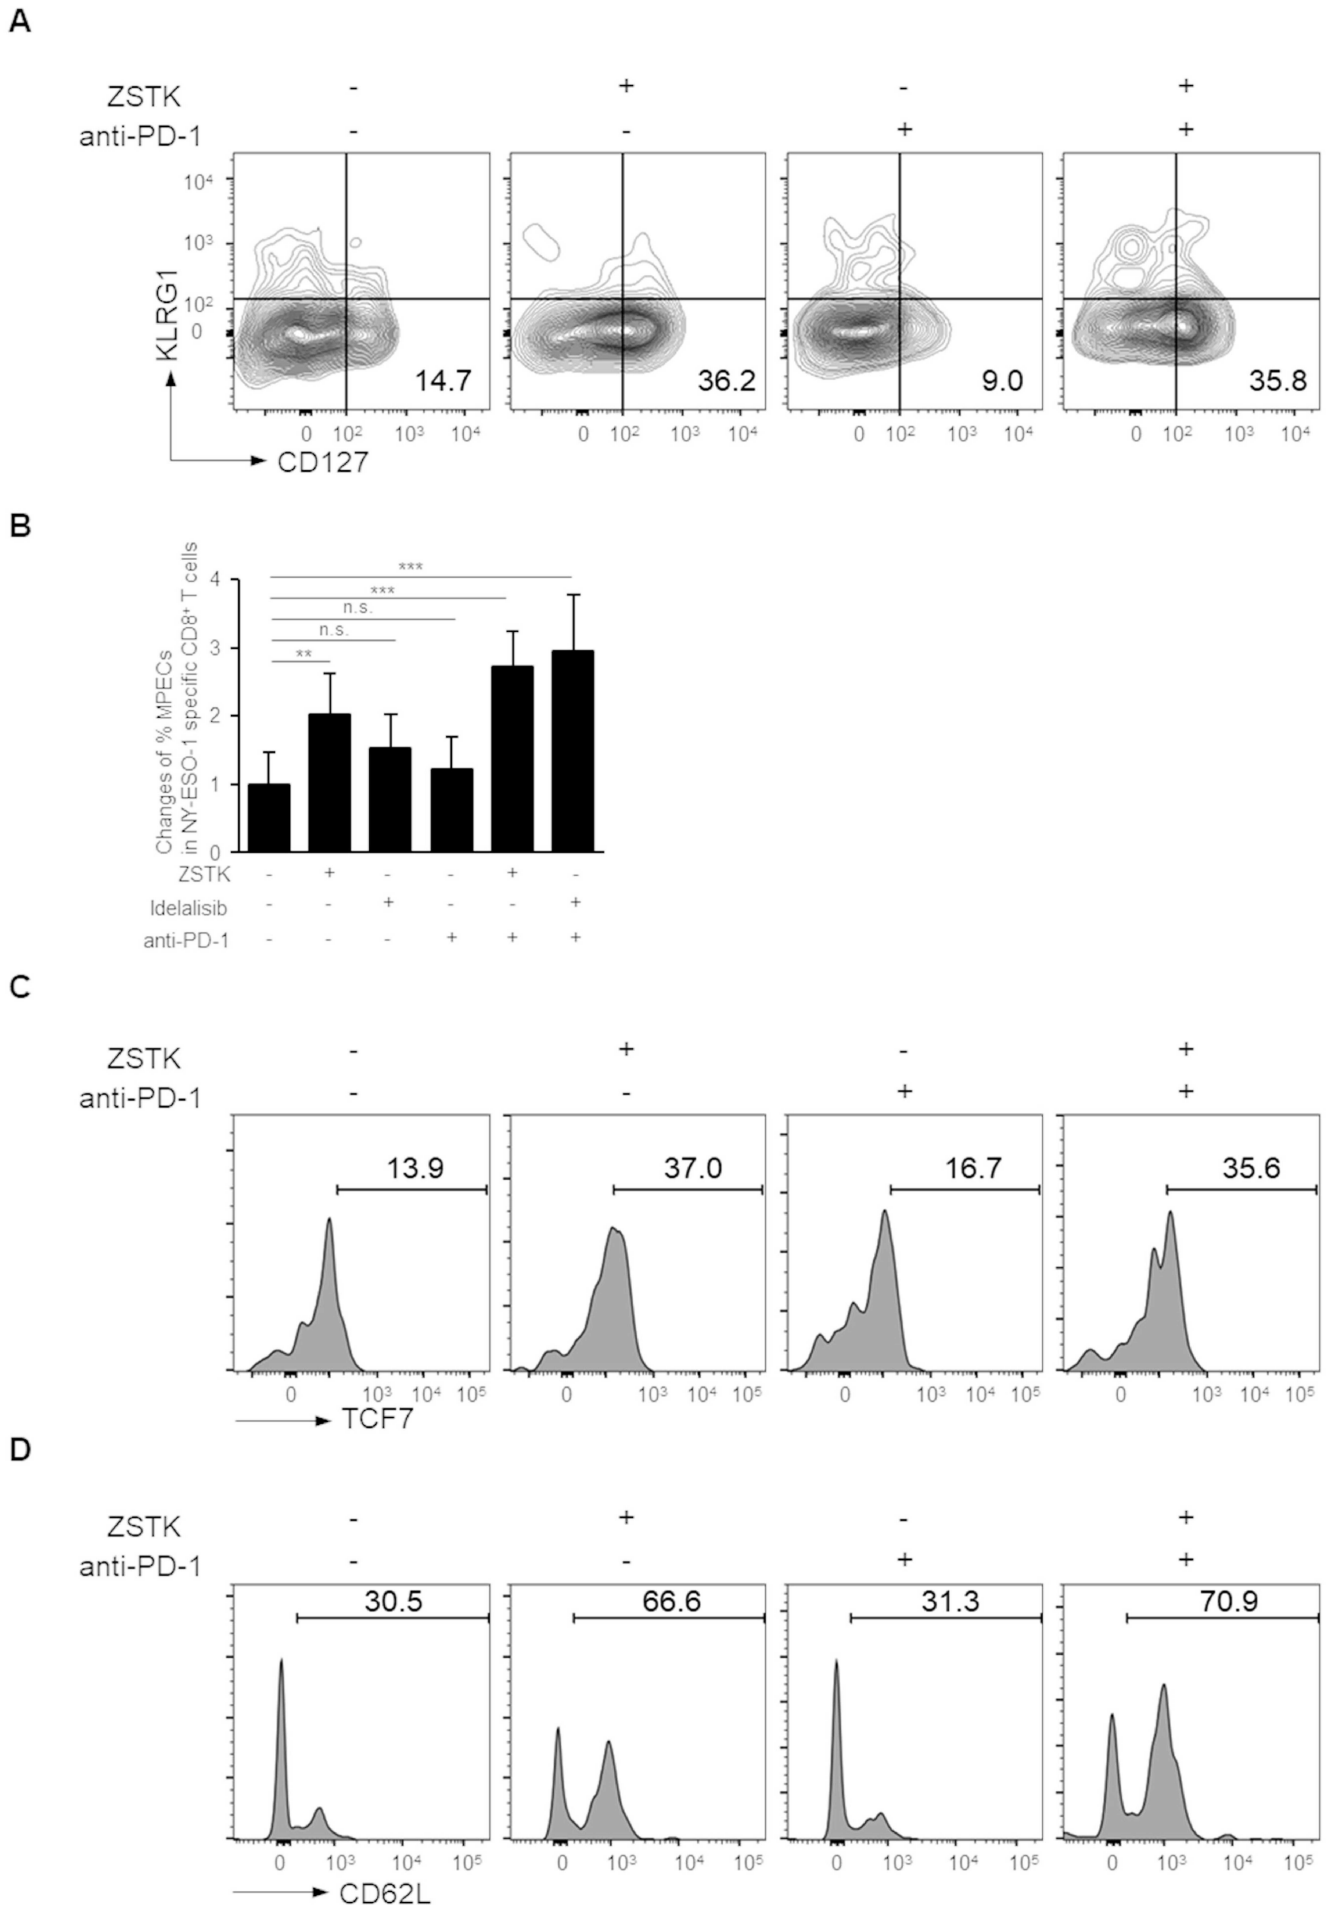

Supplementary figure. S6
