# Supplementary material
Source: HighWire-hosted journal article supplement (https://jitc.bmj.com/content/9/8/e002279)
Supplement: inline-supplementary-material-9 [file inline-supplementary-material-9.pdf]

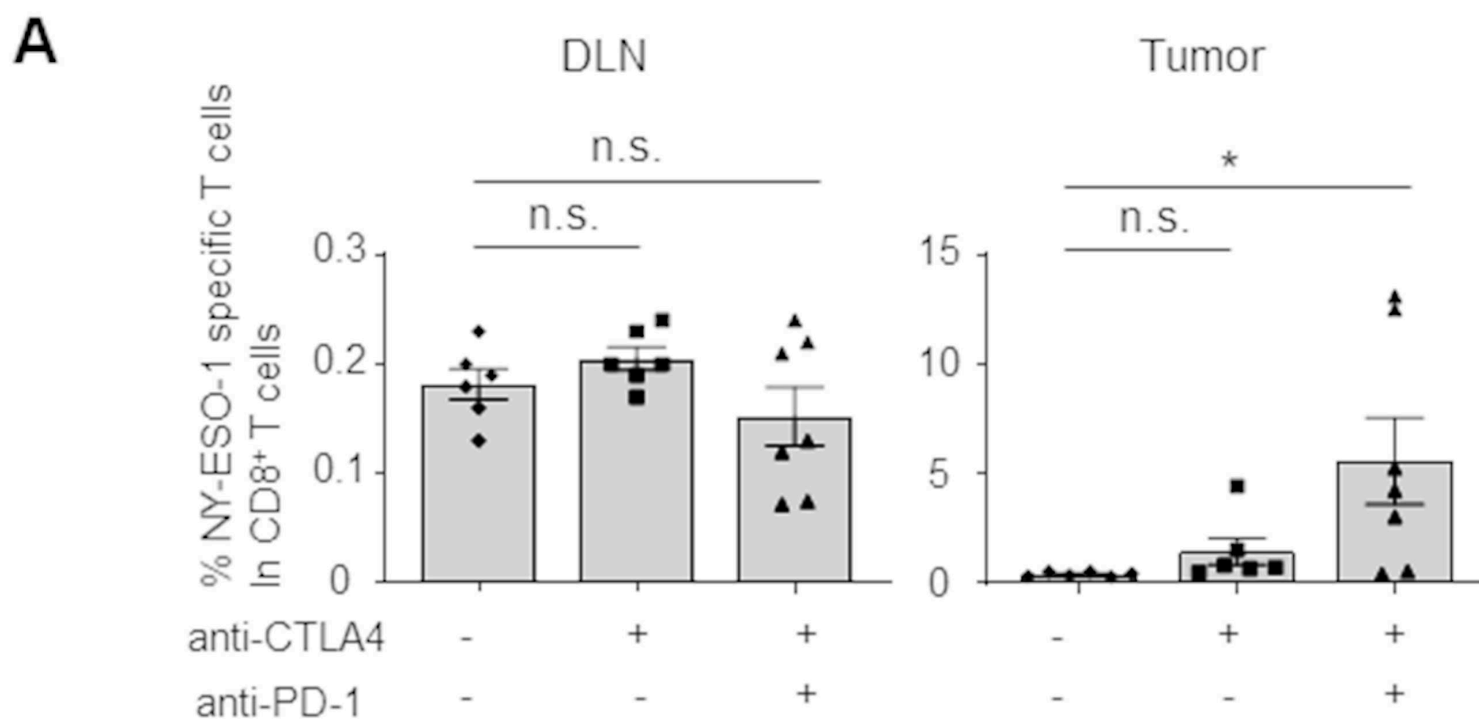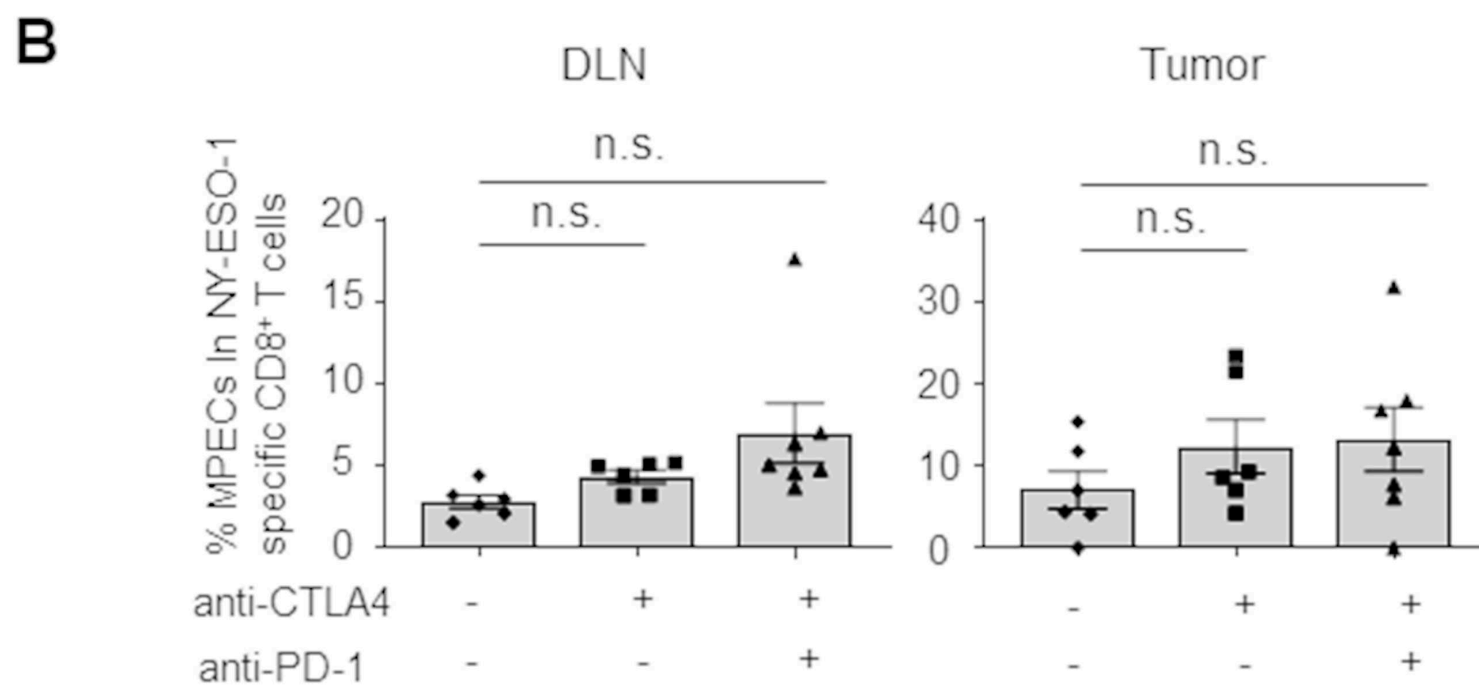

## Supplemental figure. S7
